# Supplementary material for: A facile one-step route to synthesize the three-layer nanostructure of CuS/RGO/Ni3S2 and its high electrochemical performance
Source: Royal Society of Chemistry journal article supplement (doi:10.1039/c5ra26428f), 2016-01-01
Supplement: c5ra26428f1.pdf [file c5ra26428f1.pdf]

**Supporting Information:**

**A Facile One-step Route to Synthesize Three-layer  
Nanostructure of CuS/RGO/Ni<sub>3</sub>S<sub>2</sub> and its High  
Electrochemical Performance**

Kun Wang, Chongjun Zhao\*, Zhuomin Zhang, Shudi Min, Xiuzhen Qian

*Key Laboratory for Ultrafine Materials of Ministry of Education, Shanghai Key Laboratory of*

*Advanced Polymeric Materials, School of Materials Science and Engineering, East China*

*University of Science and Technology, Shanghai 200237, P.R. China Tel: +86-21-6425 0838; Fax:*

*+86-21-6425 0838; E-mail: [chongjunzhao@ecust.edu.cn](mailto:chongjunzhao@ecust.edu.cn)*

Table S1. Charging, discharging capacitances and the corresponding coulombic efficiencies for CRNS-180-24 at various current densities.

| Current density (mA cm <sup>-2</sup> )         | 40      | 60     | 80     | 100    | 150    | 200    |
|------------------------------------------------|---------|--------|--------|--------|--------|--------|
| Charging capacitance (mF cm <sup>-2</sup> )    | 10603.6 | 9501.8 | 8334.5 | 6581.8 | 6109.1 | 5236.4 |
| Discharging capacitance (mF cm <sup>-2</sup> ) | 10494.5 | 9016.4 | 7979.6 | 6356.4 | 5694.5 | 4930.9 |
| Coulombic efficiency                           | 98.97%  | 94.89% | 95.74% | 96.58% | 93.21% | 94.17% |

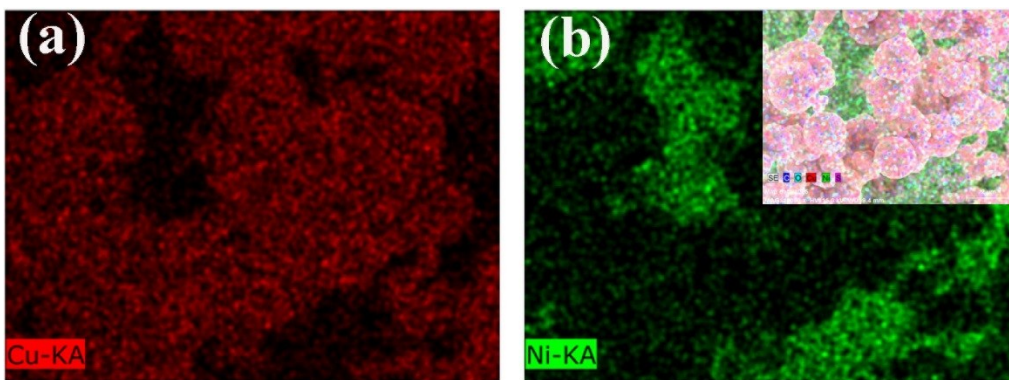

Fig. S1 EDS mapping of CRNS composite with big sphere blocks: (a) Cu elements (red); (b) Ni elements (green) and (b inset) corresponding overlay of C, O, Cu, Ni and S elements.

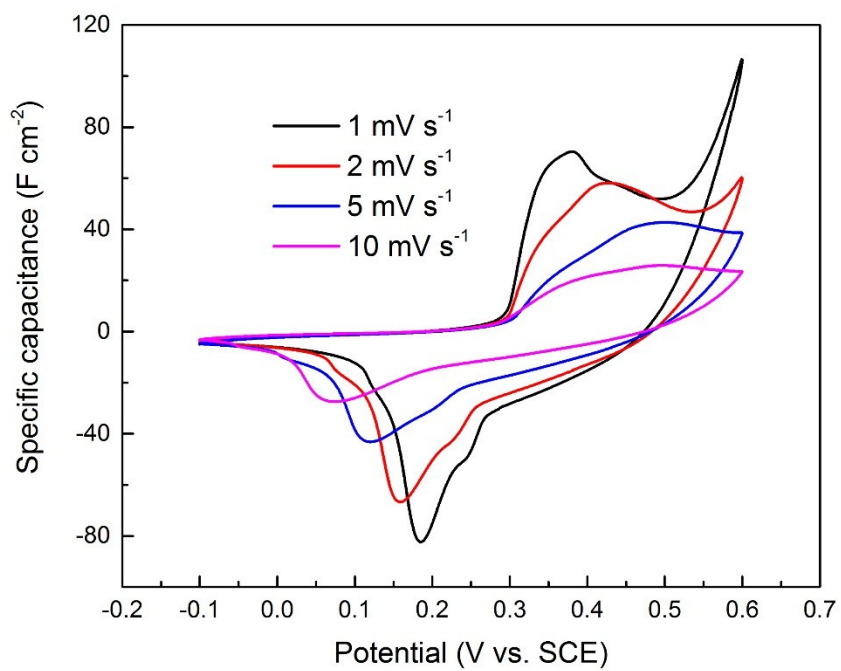

Fig. S2 Cyclic voltammograms expressed as specific capacitance vs. cell potential for CRNS-180-24 at various scan rates.
